# Supplementary material for: Dietary Supplement of Grape Wastes Enhances Honeybee Immune System and Reduces Deformed Wing Virus (DWV) Load
Source: MDPI journal article supplement (doi:10.3390/antiox12010054), 2022-12-27
Supplement: s1 [file s1]

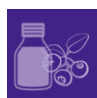

## Article

# Dietary supplement of grape wastes enhances honeybee immune system and reduces deformed wing virus (DWV) load

Guillermo Pascual <sup>1</sup>, Diego Silva <sup>1</sup>, Marisol Vargas <sup>1</sup>, Mario Aranda <sup>2</sup>, Juan Antonio Cañumir <sup>3</sup>,  
María Dolores López <sup>1,\*</sup>

<sup>1</sup> Departamento de Producción Vegetal, Facultad de Agronomía, Universidad de Concepción, Vicente Méndez #595, Chillán3780000, Chile

<sup>2</sup> Laboratorio de Investigación en Fármacos y Alimentos, Departamento de Farmacia, Facultad de Química y de Farmacia, Pontificia Universidad Católica de Chile, Vicuña Mackenna 4860, Macul, Santiago 7810000, Chile

<sup>3</sup> Laboratorio de Bioprocesos, Departamento de Agroindustria, Facultad de Ingeniería Agrícola, Universidad de Concepción, Vicente Méndez #595, Chillán3780000, Chile; jcanumir@udec.cl

\* Correspondence: mlopezb@udec.cl

## Supplementary Materials

Figure S1. Klapen-Meiners survival curves for 4 doses of GPP (0.5 %; 1 %; 2.5 %; 5 %) in honeybees.

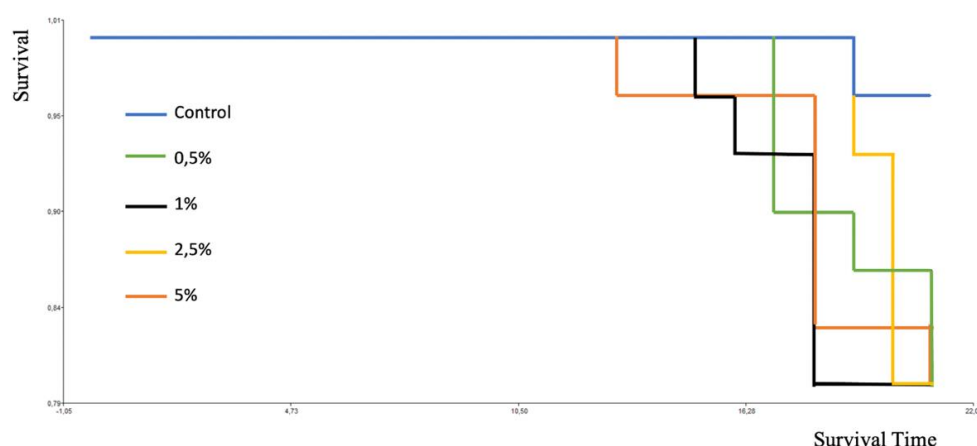

Chi-square treatment for log rank test=4.515 p=0.340820

| Treatment | case | Time | Exposed | Deaths | Survival | E.E  |
|-----------|------|------|---------|--------|----------|------|
| 0,50%     | 1    | 17   | 30      | 1      | 0,97     | 0,03 |
| 0,50%     | 6    | 18   | 29      | 5      | 0,80     | 0,07 |
| 0,50%     | 30   | 21   | 24      | 0      | 0,80     | 0,07 |
| 1,00%     | 1    | 15   | 30      | 1      | 0,97     | 0,03 |
| 1,00%     | 2    | 16   | 29      | 1      | 0,93     | 0,04 |
| 1,00%     | 3    | 17   | 28      | 1      | 0,90     | 0,05 |
| 1,00%     | 4    | 19   | 27      | 1      | 0,87     | 0,06 |
| 1,00%     | 6    | 20   | 26      | 2      | 0,80     | 0,07 |
| 1,00%     | 30   | 21   | 24      | 0      | 0,80     | 0,07 |
| 2,50%     | 3    | 19   | 30      | 2      | 0,93     | 0,04 |
| 2,50%     | 5    | 20   | 28      | 2      | 0,87     | 0,06 |
| 2,50%     | 30   | 21   | 26      | 1      | 0,83     | 0,07 |
| 5,00%     | 1    | 13   | 30      | 1      | 0,97     | 0,03 |
| 5,00%     | 3    | 17   | 29      | 1      | 0,93     | 0,04 |
| 5,00%     | 8    | 18   | 28      | 3      | 0,83     | 0,06 |
| 5,00%     | 30   | 21   | 25      | 1      | 0,80     | 0,07 |
| control   | 1    | 19   | 30      | 1      | 0,97     | 0,03 |
| control   | 30   | 21   | 29      | 0      | 0,97     | 0,03 |

Figure S2. Chromatograms of each detection wavelength for GP and GPP analyzed by HPLC-DAD at (a) 280 nm, (b) 320 nm and (c) 360 nm and (d) 520 nm.

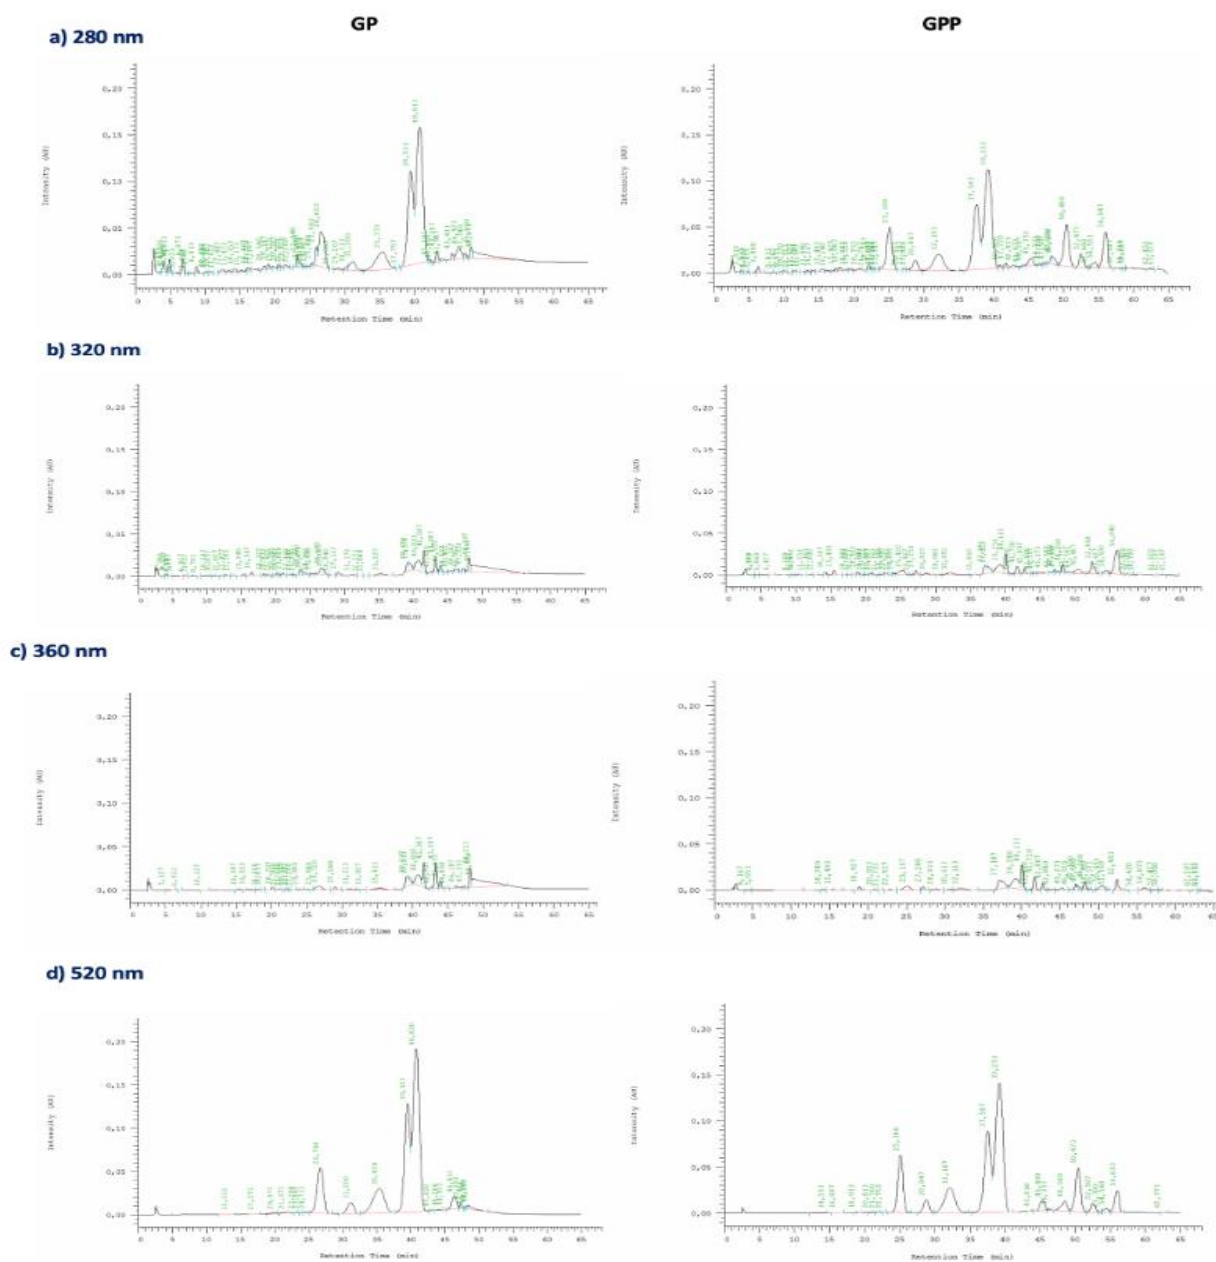

Table S1. Summary of conditions of the preparation of spray-drying

| Conditions used                              | SD  |
|----------------------------------------------|-----|
| Inlet air Temperature (°C)                   | 120 |
| Feed flow rate (mL min <sup>-1</sup> )       | 4   |
| Wall material content (% w v <sup>-1</sup> ) | 20  |

SD: Spray-Drying (powder)

Table S2. Mean values for loading capacity, powder recovery and entrapment efficiency of powder based on grape pomace obtained by spray-drying.

| Formulation Method <sup>1</sup> | Loading capacity <sup>2</sup> | Powder Recovery <sup>3</sup> | Entrapment Efficiency <sup>4</sup> |
|---------------------------------|-------------------------------|------------------------------|------------------------------------|
| SD                              | 77.06                         | 42.04                        | 41.10                              |

<sup>1</sup>SD: Spray-Drying (powder); <sup>2</sup>Loading capacity was expressed as g total phenolic compounds per 100 g-1 powder; <sup>3</sup>Powder Recovery was expressed as g powder per 100 g-1 initial solids; <sup>4</sup>Entrapment efficiency was expressed as g total phenolic compounds encapsulated per 100 g-1 phenolic compounds from pomace added.
